# Supplementary material
Source: PubMed Central journal article supplement (PMC7679077)
Supplement: NIHMS1516169-supplement-Supporting_Information.pdf [file NIHMS1516169-supplement-Supporting_Information.pdf]

# Supporting Information

## Table of Contents

|                                                                                 |         |
|---------------------------------------------------------------------------------|---------|
| 1) Synthesis and spectroscopic data of <b>2</b> , <b>3</b> , and <b>4</b> ..... | S2-S6   |
| 2) Computational data of <b>2</b> , [ <b>3-Ph</b> ], and <b>4</b> .....         | S7-S13  |
| 3) X-ray Data of <b>2</b> , <b>3</b> , and <b>4</b> .....                       | S14-S27 |

## SUPPORTING INFORMATIONS of SYNTHESSES

### Materials and Methods

#### General.

The syntheses of air-sensitive compounds were performed under purified argon using Schlenk techniques and an inert atmosphere drybox (M-Braun LabMaster SP). Chemicals were purchased from Aldrich and Strem and used as received. The solvents were dried and distilled under argon from Na/benzophenone prior to use.  $^1\text{H}$ ,  $^{13}\text{C}\{^1\text{H}\}$ , and  $^{11}\text{B}$  NMR spectra were recorded on a Bruker Avance III HD 400 MHz spectrometer. EPR spectra of **2** $\cdot$  and **3** $\cdot$  were recorded using an ESP-300D spectrometer (Bruker, Billerica, MA) equipped with an ER-4102 rectangular cavity. X-ray intensity data for **2** $\cdot$ , **3** $\cdot$ , and **4** were collected on a Bruker D8 Quest PHOTON 100 CMOS X-ray diffractometer system with Incoatec Microfocus Source (I $\mu$ S) monochromated Mo K $\alpha$  radiation ( $\lambda = 0.71073 \text{ \AA}$ , sealed tube) using phi and omega-scan technique.

Compound **2** $\cdot$ : To a slurry of **1** $\cdot$  (0.660 g, 1.04 mmol) in hexane (45 mL) at  $-78 \text{ }^\circ\text{C}$  was added a solution of  $\text{BBr}_3$  (0.902 g, 3.60 mmol) in hexane (35 mL). The mixture was allowed to gradually warm to the room temperature over night, and stirred for a further 2 h. After the volatile materials were removed in vacuo, the residue was extracted using 100 mL of toluene. Removing toluene from the filtrate in vacuo gave raw material of **2** $\cdot$  (0.565 g, 83.1% yield). X-ray quality dark blue crystals of **2** $\cdot$  were obtained in the concentrated toluene solution at room temperature. Mp: melt at  $215\text{--}216 \text{ }^\circ\text{C}$ . UV-vis ( $\lambda/\text{nm}$ ): 431 (shoulder), 564 (shoulder), 606, 654. Crystal data for **2** $\cdot$ :  $\text{C}_{27}\text{H}_{34}\text{BBr}_2\text{N}_2\text{S}_3$ , fw = 653.37, orthorhombic,  $Pnma$ ,  $a = 11.5767(6) \text{ \AA}$ ,  $b = 17.8070(9) \text{ \AA}$ ,  $c = 15.3595(9) \text{ \AA}$ ,  $\beta = 101.457(6)^\circ$ ,  $V = 3166.3(3) \text{ \AA}^3$ ,  $Z = 4$ ,  $R_1 = 0.0560$  for 2292 data ( $I > 2\sigma(I)$ ),  $wR_2 = 0.1596$  (all data).

Compound **3** $\cdot$ : 10 mL of hexane solution of  $(\text{C}_6\text{H}_{11})_2\text{BCl}$  (0.330 g, 1.55 mmol) was added to a Schlenk flask containing **1** $\cdot$  (0.983 g, 1.55 mmol) in 40 mL of hexane at  $0 \text{ }^\circ\text{C}$ . The mixture was allowed to gradually warm to the room temperature and stirred for a further 8 h. After the volatile materials were removed in vacuo, the residue was extracted using 60 mL of toluene. Removing toluene from the filtrate in vacuo gave raw dark blue powder of **3** $\cdot$  in a quantitative yield. X-ray quality dark blue crystals of **3** $\cdot$  were obtained by keeping the concentrated toluene or hexane solution of **3** $\cdot$  at  $-35 \text{ }^\circ\text{C}$  over 3 days. Mp: gradually decomposed ( $> 118^\circ\text{C}$ ). UV-vis ( $\lambda/\text{nm}$ ): 596, 630. Crystal data for **3** $\cdot$ :  $\text{C}_{39}\text{H}_{56}\text{BN}_2\text{S}_3$ , fw = 659.84, monoclinic,  $P2_1/c$ ,  $a = 10.8184(14) \text{ \AA}$ ,  $b = 22.527(3) \text{ \AA}$ ,  $c = 16.534(2) \text{ \AA}$ ,  $\beta = 103.111(3)^\circ$ ,  $V = 3924.2(9) \text{ \AA}^3$ ,  $Z = 4$ ,  $R_1 = 0.0739$  for 4536 data ( $I > 2\sigma(I)$ ),  $wR_2 = 0.2120$  (all data).

Compound **4**: A Schlenk tube containing 0.538 g (0.72 mmol) of **3** $\cdot$  in 10 mL of toluene was heated in an oil bath at a temperature of  $50 \text{ }^\circ\text{C}$  for 6 h. After the volatile materials were removed from the greenish solution in vacuo, the residue was kept at  $30 \text{ }^\circ\text{C}$  for two days, inducing crystallization of **4**. The mixture was then rinsed using cold hexane, giving

crystalline solid of **4** (0.147 g, 48.4% yield in terms of  $^1\text{H}$  NMR data). X-ray quality yellow-green crystals of **4** were obtained by recrystallization in the toluene/hexane mixed solvent at room temperature. Mp: gradually decomposed ( $> 185^\circ\text{C}$ ) and melt ( $222\text{-}223^\circ\text{C}$ ).  $^1\text{H}$  NMR (400.14 MHz,  $\text{C}_6\text{D}_6$ ):  $\delta$  0.56-0.85 (m, 5H,  $\text{C}_6\text{H}_{11}$ ), 0.99-1.21 (m, 7H,  $\text{C}_6\text{H}_{11}$ ), 1.24 [d, 12H,  $\text{CH}(\text{CH}_3)_2$ ], 1.45-1.67 (m, 10H,  $\text{C}_6\text{H}_{11}$ ), 1.52 [d, 12H,  $\text{CH}(\text{CH}_3)_2$ ], 1.93 (d, 2H,  $\text{C}_6\text{H}_{11}$ ), 2.03 (d, 4H,  $\text{C}_6\text{H}_{11}$ ), 2.31 (d, 4H,  $\text{C}_6\text{H}_{11}$ ), 2.48 (tt, 1H,  $\text{SC}_6\text{H}_{11}$ ), 2.77 [m, 4H,  $\text{CH}(\text{CH}_3)_2$ ], 7.06 [d, 4H, Ar-*H*], 7.19 [t, 2H, Ar-*H*].  $^{13}\text{C}\{^1\text{H}\}$  NMR (100.63 MHz,  $\text{C}_6\text{D}_6$ ):  $\delta$  23.7, 25.5 [ $\text{CH}(\text{CH}_3)_2$ ], 29.9 [ $\text{CH}(\text{CH}_3)_2$ ], 25.2, 26.0, 28.9, 29.7, 31.5, 34.8, 51.6 ( $\text{C}_6\text{H}_{11}$ ), 34.7 (bs, CB), 129.7 (NCCN), 125.0, 131.6, 132.0, 146.6 (Ar-C), 143.8 [NC(=S)N].  $^{11}\text{B}$  NMR (128.38 MHz,  $\text{C}_6\text{D}_6$ ):  $\delta$  18.85. Crystal data for **4**:  $\text{C}_{45}\text{H}_{67}\text{BN}_2\text{S}_3$ , fw = 742.99, monoclinic,  $C2/c$ ,  $a = 34.0880(16)$  Å,  $b = 10.7509(5)$  Å,  $c = 26.1095(12)$  Å,  $\beta = 111.7780(10)^\circ$ ,  $V = 8885.6(7)$  Å<sup>3</sup>,  $Z = 8$ ,  $R1 = 0.0542$  for 6992 data ( $I > 2\sigma(I)$ ),  $wR_2 = 0.1473$  (all data).

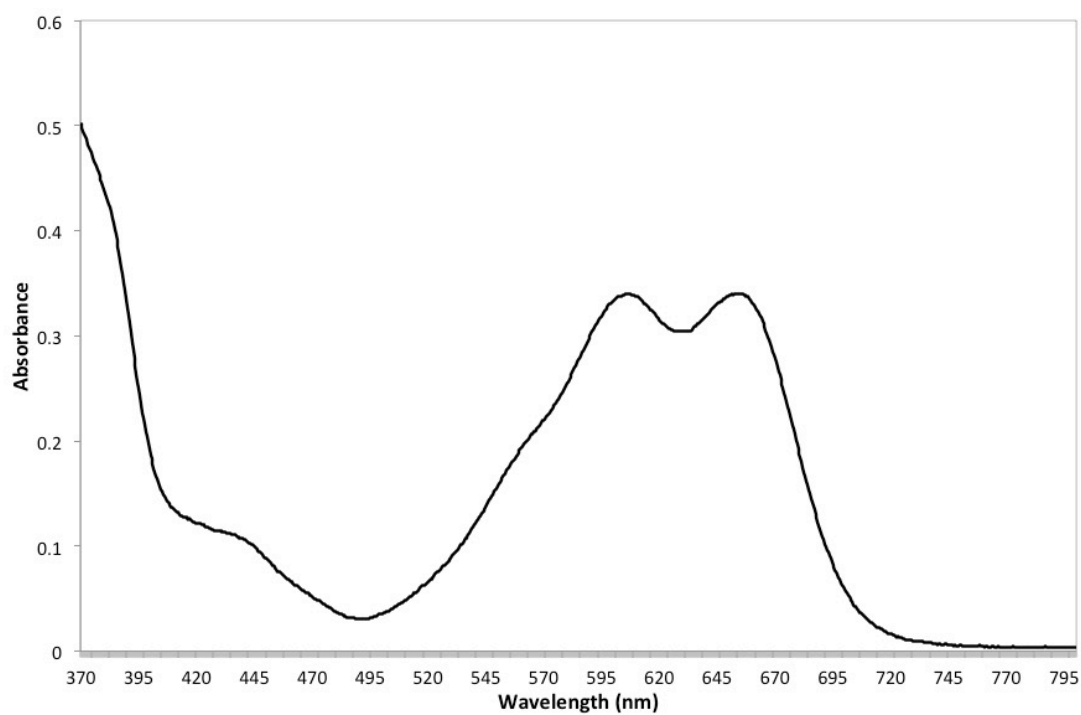

**Figure S1.** The UV-Vis absorption spectrum for **2\***.

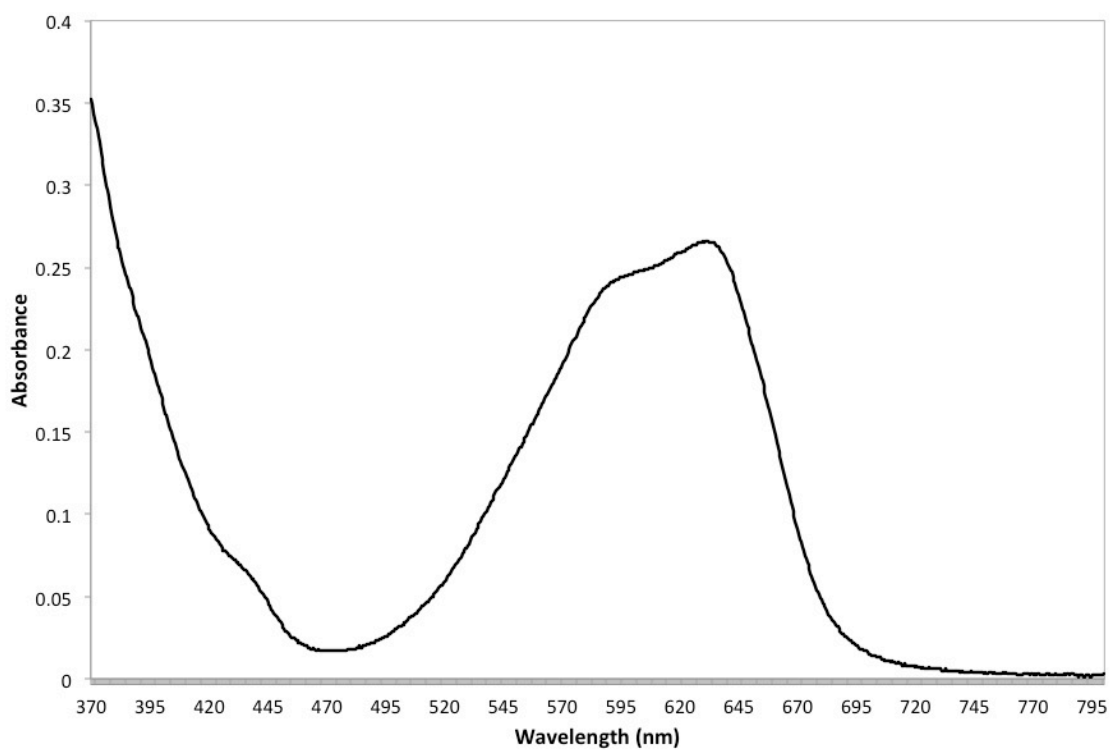

**Figure S2.** The UV-Vis absorption spectrum for **3\***.

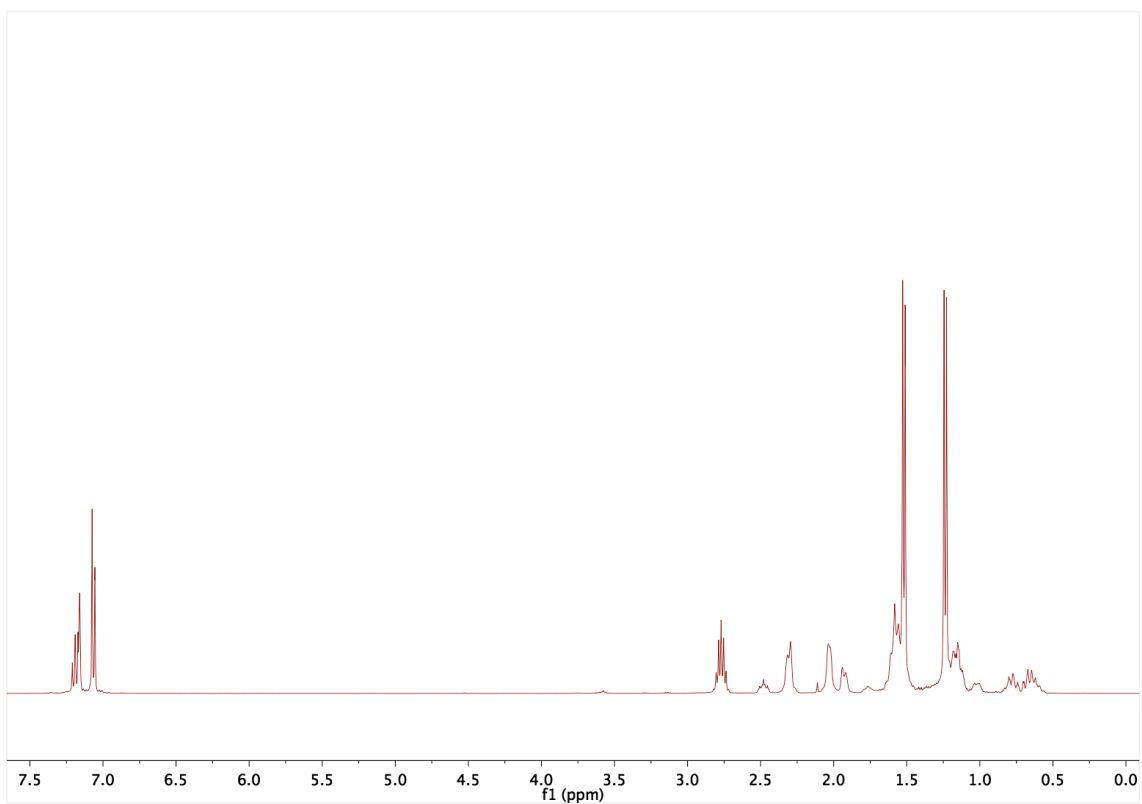

**Figure S3.**  $^1\text{H}$  NMR spectrum of **4** in  $\text{C}_6\text{D}_6$ .

## SUPPORTING INFORMATIONS of COMPUTATIONS

All computations employed the Gaussian09 programs:

For Gaussian 09: M. J. Frisch, G. W. Trucks, H. B. Schlegel, G. E. Scuseria, M. A. Robb, J. R. Cheeseman, G. Scalmani, V. Barone, B. Mennucci, G. A. Petersson, H. Nakatsuji, M. Caricato, X. Li, H. P. Hratchian, A. F. Izmaylov, J. Bloino, G. Zheng, J. L. Sonnenberg, M. Hada, M. Ehara, K. Toyota, R. Fukuda, J. Hasegawa, M. Ishida, T. Nakajima, Y. Honda, O. Kitao, H. Nakai, T. Vreven, J. A. Montgomery, Jr., J. E. Peralta, F. Ogliaro, M. Bearpark, J. J. Heyd, E. Brothers, K. N. Kudin, V. N. Staroverov, T. Keith, R. Kobayashi, J. Normand, K. Raghavachari, A. Rendell, J. C. Burant, S. S. Iyengar, J. Tomasi, M. Cossi, N. Rega, J. M. Millam, M. Klene, J. E. Knox, J. B. Cross, V. Bakken, C. Adamo, J. Jaramillo, R. Gomperts, R. E. Stratmann, O. Yazyev, A. J. Austin, R. Cammi, C. Pomelli, J. W. Ochterski, R. L. Martin, K. Morokuma, V. G. Zakrzewski, G. A. Voth, P. Salvador, J. J. Dannenberg, S. Dapprich, A. D. Daniels, O. Farkas, J. B. Foresman, J. V. Ortiz, J. Cioslowski, and D. J. Fox, *Gaussian 09*, revision D.01; Gaussian, Inc., Wallingford CT, 2013.

**Table S1.** Coordinates of the B3LYP/6-311G\*\* optimized geometry of  $2^{\bullet}$  (in  $C_{2v}$  symmetry).

| Center Number | Atomic Number | Atomic Type | Coordinates (Angstroms) |           |           |
|---------------|---------------|-------------|-------------------------|-----------|-----------|
|               |               |             | X                       | Y         | Z         |
| 1             | 5             | 0           | 0.000000                | 0.000000  | -2.981062 |
| 2             | 35            | 0           | 1.674042                | 0.000000  | -4.105978 |
| 3             | 35            | 0           | -1.674042               | 0.000000  | -4.105978 |
| 4             | 16            | 0           | 0.000000                | 0.000000  | 3.458848  |
| 5             | 16            | 0           | 0.000000                | 1.594834  | -1.799948 |
| 6             | 7             | 0           | 0.000000                | 1.110422  | 0.958129  |
| 7             | 6             | 0           | 0.000000                | 0.000000  | 1.805597  |
| 8             | 6             | 0           | 0.000000                | 0.701399  | -0.349184 |
| 9             | 6             | 0           | 0.000000                | 2.491977  | 1.389458  |
| 10            | 6             | 0           | 1.235701                | 3.136161  | 1.574029  |
| 11            | 6             | 0           | 1.204227                | 4.480583  | 1.952858  |
| 12            | 1             | 0           | 2.136586                | 5.011391  | 2.104481  |
| 13            | 6             | 0           | 0.000000                | 5.146696  | 2.138973  |
| 14            | 1             | 0           | 0.000000                | 6.190633  | 2.431909  |
| 15            | 6             | 0           | -1.204227               | 4.480583  | 1.952858  |
| 16            | 1             | 0           | -2.136586               | 5.011391  | 2.104481  |
| 17            | 6             | 0           | -1.235701               | 3.136161  | 1.574029  |
| 18            | 6             | 0           | -2.575788               | 2.434781  | 1.386228  |
| 19            | 1             | 0           | -2.381074               | 1.397727  | 1.104517  |
| 20            | 6             | 0           | -3.394305               | 3.069763  | 0.246211  |
| 21            | 1             | 0           | -4.325506               | 2.516329  | 0.096866  |
| 22            | 1             | 0           | -3.656956               | 4.106568  | 0.474036  |
| 23            | 1             | 0           | -2.841444               | 3.060904  | -0.695585 |
| 24            | 6             | 0           | -3.379086               | 2.402059  | 2.700166  |
| 25            | 1             | 0           | -2.805312               | 1.931742  | 3.501320  |
| 26            | 1             | 0           | -3.653110               | 3.409631  | 3.025171  |
| 27            | 1             | 0           | -4.304425               | 1.835753  | 2.561838  |
| 28            | 6             | 0           | 2.575788                | 2.434781  | 1.386228  |
| 29            | 1             | 0           | 2.381074                | 1.397727  | 1.104517  |
| 30            | 6             | 0           | 3.394305                | 3.069763  | 0.246211  |
| 31            | 1             | 0           | 4.325506                | 2.516329  | 0.096866  |
| 32            | 1             | 0           | 2.841444                | 3.060904  | -0.695585 |
| 33            | 1             | 0           | 3.656956                | 4.106568  | 0.474036  |
| 34            | 6             | 0           | 3.379086                | 2.402059  | 2.700166  |
| 35            | 1             | 0           | 4.304425                | 1.835753  | 2.561838  |
| 36            | 1             | 0           | 3.653110                | 3.409631  | 3.025171  |
| 37            | 1             | 0           | 2.805312                | 1.931742  | 3.501320  |
| 38            | 16            | 0           | 0.000000                | -1.594834 | -1.799948 |
| 39            | 7             | 0           | 0.000000                | -1.110422 | 0.958129  |
| 40            | 6             | 0           | 0.000000                | -0.701399 | -0.349184 |
| 41            | 6             | 0           | 0.000000                | -2.491977 | 1.389458  |
| 42            | 6             | 0           | 1.235701                | -3.136161 | 1.574029  |
| 43            | 6             | 0           | 1.204227                | -4.480583 | 1.952858  |
| 44            | 1             | 0           | 2.136586                | -5.011391 | 2.104481  |
| 45            | 6             | 0           | 0.000000                | -5.146696 | 2.138973  |
| 46            | 1             | 0           | 0.000000                | -6.190633 | 2.431909  |
| 47            | 6             | 0           | -1.204227               | -4.480583 | 1.952858  |
| 48            | 1             | 0           | -2.136586               | -5.011391 | 2.104481  |
| 49            | 6             | 0           | -1.235701               | -3.136161 | 1.574029  |
| 50            | 6             | 0           | -2.575788               | -2.434781 | 1.386228  |
| 51            | 1             | 0           | -2.381074               | -1.397727 | 1.104517  |
| 52            | 6             | 0           | -3.394305               | -3.069763 | 0.246211  |
| 53            | 1             | 0           | -4.325506               | -2.516329 | 0.096866  |
| 54            | 1             | 0           | -3.656956               | -4.106568 | 0.474036  |
| 55            | 1             | 0           | -2.841444               | -3.060904 | -0.695585 |
| 56            | 6             | 0           | -3.379086               | -2.402059 | 2.700166  |
| 57            | 1             | 0           | -2.805312               | -1.931742 | 3.501320  |



|    |   |   |           |           |           |
|----|---|---|-----------|-----------|-----------|
| 58 | 1 | 0 | -3.653110 | -3.409631 | 3.025171  |
| 59 | 1 | 0 | -4.304425 | -1.835753 | 2.561838  |
| 60 | 6 | 0 | 2.575788  | -2.434781 | 1.386228  |
| 61 | 1 | 0 | 2.381074  | -1.397727 | 1.104517  |
| 62 | 6 | 0 | 3.394305  | -3.069763 | 0.246211  |
| 63 | 1 | 0 | 4.325506  | -2.516329 | 0.096866  |
| 64 | 1 | 0 | 2.841444  | -3.060904 | -0.695585 |
| 65 | 1 | 0 | 3.656956  | -4.106568 | 0.474036  |
| 66 | 6 | 0 | 3.379086  | -2.402059 | 2.700166  |
| 67 | 1 | 0 | 4.304425  | -1.835753 | 2.561838  |
| 68 | 1 | 0 | 3.653110  | -3.409631 | 3.025171  |
| 69 | 1 | 0 | 2.805312  | -1.931742 | 3.501320  |

---

**Table S2.** Coordinates of the B3LYP/6-311G\*\* optimized geometry of [3-Ph]<sup>+</sup>.

| Center<br>Number | Atomic<br>Number | Atomic<br>Type | Coordinates (Angstroms) |           |           |
|------------------|------------------|----------------|-------------------------|-----------|-----------|
|                  |                  |                | X                       | Y         | Z         |
| 1                | 5                | 0              | 2.039405                | -0.010684 | 0.014698  |
| 2                | 16               | 0              | -4.494622               | 0.030183  | -0.057499 |
| 3                | 16               | 0              | 0.766311                | 1.568350  | 0.363319  |
| 4                | 16               | 0              | 0.755375                | -1.567659 | -0.387273 |
| 5                | 7                | 0              | -1.985926               | 1.091333  | 0.221131  |
| 6                | 7                | 0              | -1.993661               | -1.062266 | -0.284412 |
| 7                | 6                | 0              | -2.839782               | 0.019117  | -0.037648 |
| 8                | 6                | 0              | -0.670244               | 0.691950  | 0.134090  |
| 9                | 6                | 0              | -0.675135               | -0.674198 | -0.188224 |
| 10               | 6                | 0              | -2.440282               | -2.393699 | -0.594675 |
| 11               | 6                | 0              | -2.799191               | -3.252639 | 0.439579  |
| 12               | 6                | 0              | -3.211698               | -4.546457 | 0.135891  |
| 13               | 1                | 0              | -3.495506               | -5.220750 | 0.935162  |
| 14               | 6                | 0              | -3.259801               | -4.971798 | -1.190313 |
| 15               | 1                | 0              | -3.581272               | -5.980329 | -1.423235 |
| 16               | 6                | 0              | -2.896464               | -4.103475 | -2.217472 |
| 17               | 1                | 0              | -2.935226               | -4.432638 | -3.249064 |
| 18               | 6                | 0              | -2.485233               | -2.806656 | -1.922589 |
| 19               | 6                | 0              | -2.423076               | 2.425816  | 0.532815  |
| 20               | 6                | 0              | -2.731438               | 2.753982  | 1.849392  |
| 21               | 6                | 0              | -3.133581               | 4.051997  | 2.149615  |
| 22               | 1                | 0              | -3.378391               | 4.315159  | 3.171808  |
| 23               | 6                | 0              | -3.221593               | 5.007813  | 1.139430  |
| 24               | 1                | 0              | -3.534858               | 6.017888  | 1.376828  |
| 25               | 6                | 0              | -2.908991               | 4.667967  | -0.175078 |
| 26               | 1                | 0              | -2.979166               | 5.410043  | -0.961482 |
| 27               | 6                | 0              | -2.508308               | 3.371232  | -0.484424 |
| 28               | 6                | 0              | 2.119696                | 0.606297  | -2.605225 |
| 29               | 1                | 0              | 1.517008                | 1.510441  | -2.450292 |
| 30               | 1                | 0              | 1.414609                | -0.204126 | -2.813799 |
| 31               | 6                | 0              | 3.029109                | 0.823352  | -3.824375 |
| 32               | 1                | 0              | 3.554660                | -0.112779 | -4.055196 |
| 33               | 1                | 0              | 2.424197                | 1.064720  | -4.705676 |
| 34               | 6                | 0              | 4.059620                | 1.930381  | -3.570202 |
| 35               | 1                | 0              | 4.726896                | 2.037877  | -4.432110 |
| 36               | 1                | 0              | 3.537352                | 2.889896  | -3.458387 |
| 37               | 6                | 0              | 4.870087                | 1.647343  | -2.299599 |
| 38               | 1                | 0              | 5.562086                | 2.472660  | -2.098314 |
| 39               | 1                | 0              | 5.488727                | 0.754382  | -2.459378 |
| 40               | 6                | 0              | 3.962460                | 1.414743  | -1.081046 |
| 41               | 1                | 0              | 3.441741                | 2.353497  | -0.844283 |
| 42               | 1                | 0              | 4.582126                | 1.181195  | -0.210497 |
| 43               | 6                | 0              | 2.915202                | 0.298652  | -1.317145 |
| 44               | 1                | 0              | 3.480422                | -0.626950 | -1.515655 |
| 45               | 6                | 0              | 2.849058                | -0.336987 | 1.384911  |
| 46               | 1                | 0              | 3.431534                | 0.573112  | 1.603540  |
| 47               | 6                | 0              | 3.873441                | -1.483267 | 1.198823  |
| 48               | 1                | 0              | 4.535627                | -1.270672 | 0.354677  |
| 49               | 1                | 0              | 3.337622                | -2.408480 | 0.943601  |
| 50               | 6                | 0              | 4.720406                | -1.734424 | 2.456781  |
| 51               | 1                | 0              | 5.397101                | -2.579801 | 2.289645  |
| 52               | 1                | 0              | 5.355979                | -0.858018 | 2.640058  |
| 53               | 6                | 0              | 3.847213                | -1.987508 | 3.691995  |
| 54               | 1                | 0              | 4.473345                | -2.109306 | 4.582438  |
| 55               | 1                | 0              | 3.303135                | -2.932433 | 3.561745  |

|    |   |   |           |           |           |
|----|---|---|-----------|-----------|-----------|
| 56 | 6 | 0 | 2.838925  | -0.850506 | 3.896687  |
| 57 | 1 | 0 | 2.190100  | -1.070005 | 4.752038  |
| 58 | 1 | 0 | 3.380394  | 0.071677  | 4.146159  |
| 59 | 6 | 0 | 1.989651  | -0.614239 | 2.638544  |
| 60 | 1 | 0 | 1.300847  | 0.217677  | 2.813232  |
| 61 | 1 | 0 | 1.368271  | -1.501439 | 2.461243  |
| 62 | 1 | 0 | -2.759111 | -2.905434 | 1.464493  |
| 63 | 1 | 0 | -2.204825 | -2.117820 | -2.709901 |
| 64 | 1 | 0 | -2.661092 | 1.998638  | 2.622160  |
| 65 | 1 | 0 | -2.267569 | 3.089358  | -1.502044 |

---

**Table S3.** Coordinates of the B3LYP/6-311G\*\* optimized geometry of 4.

| Center<br>Number | Atomic<br>Number | Atomic<br>Type | Coordinates (Angstroms) |           |           |
|------------------|------------------|----------------|-------------------------|-----------|-----------|
|                  |                  |                | X                       | Y         | Z         |
| 1                | 16               | 0              | -3.014322               | 0.560264  | 1.012358  |
| 2                | 16               | 0              | 2.097715                | -1.548525 | 0.590061  |
| 3                | 16               | 0              | 2.137782                | 1.353762  | -0.878376 |
| 4                | 7                | 0              | -0.622806               | -0.832385 | 0.762385  |
| 5                | 7                | 0              | -0.594665               | 1.130884  | -0.223905 |
| 6                | 6                | 0              | -1.425467               | 0.222110  | 0.390818  |
| 7                | 6                | 0              | 0.679878                | -0.588041 | 0.386096  |
| 8                | 6                | 0              | 0.697574                | 0.653368  | -0.238118 |
| 9                | 6                | 0              | -1.007062               | 2.401967  | -0.783490 |
| 10               | 6                | 0              | -1.037958               | 3.529480  | 0.056320  |
| 11               | 6                | 0              | -1.437328               | 4.741776  | -0.512058 |
| 12               | 1                | 0              | -1.473876               | 5.630784  | 0.106170  |
| 13               | 6                | 0              | -1.778496               | 4.829373  | -1.855139 |
| 14               | 1                | 0              | -2.084109               | 5.781355  | -2.274876 |
| 15               | 6                | 0              | -1.713576               | 3.703834  | -2.665593 |
| 16               | 1                | 0              | -1.960668               | 3.789571  | -3.717141 |
| 17               | 6                | 0              | -1.320153               | 2.463739  | -2.154002 |
| 18               | 6                | 0              | -1.205462               | 1.268057  | -3.094843 |
| 19               | 1                | 0              | -0.940347               | 0.391053  | -2.500692 |
| 20               | 6                | 0              | -0.076534               | 1.482362  | -4.122379 |
| 21               | 1                | 0              | 0.036383                | 0.592982  | -4.748749 |
| 22               | 1                | 0              | -0.298167               | 2.328558  | -4.779403 |
| 23               | 1                | 0              | 0.876035                | 1.673068  | -3.626345 |
| 24               | 6                | 0              | -2.533049               | 0.957140  | -3.809445 |
| 25               | 1                | 0              | -2.426119               | 0.060329  | -4.426080 |
| 26               | 1                | 0              | -3.344688               | 0.786413  | -3.099465 |
| 27               | 1                | 0              | -2.835503               | 1.774738  | -4.469508 |
| 28               | 6                | 0              | -0.623042               | 3.486093  | 1.522438  |
| 29               | 1                | 0              | -0.437512               | 2.444587  | 1.792573  |
| 30               | 6                | 0              | 0.696916                | 4.252018  | 1.739295  |
| 31               | 1                | 0              | 1.492079                | 3.855639  | 1.105165  |
| 32               | 1                | 0              | 0.577290                | 5.315419  | 1.511911  |
| 33               | 1                | 0              | 1.016159                | 4.166166  | 2.781811  |
| 34               | 6                | 0              | -1.728604               | 4.011879  | 2.455837  |
| 35               | 1                | 0              | -2.664765               | 3.469576  | 2.308998  |
| 36               | 1                | 0              | -1.424513               | 3.893417  | 3.499639  |
| 37               | 1                | 0              | -1.922321               | 5.075381  | 2.290557  |
| 38               | 6                | 0              | -1.072282               | -2.032884 | 1.437322  |
| 39               | 6                | 0              | -1.129028               | -2.035096 | 2.842453  |
| 40               | 6                | 0              | -1.566604               | -3.207053 | 3.464841  |
| 41               | 1                | 0              | -1.623884               | -3.243658 | 4.546157  |
| 42               | 6                | 0              | -1.919322               | -4.327092 | 2.723882  |
| 43               | 1                | 0              | -2.254925               | -5.226213 | 3.228664  |
| 44               | 6                | 0              | -1.826925               | -4.303879 | 1.338649  |
| 45               | 1                | 0              | -2.082495               | -5.191962 | 0.772819  |
| 46               | 6                | 0              | -1.394777               | -3.160734 | 0.659789  |
| 47               | 6                | 0              | -1.249165               | -3.202272 | -0.858570 |
| 48               | 1                | 0              | -0.952870               | -2.208343 | -1.200080 |
| 49               | 6                | 0              | -0.133637               | -4.180301 | -1.277273 |
| 50               | 1                | 0              | 0.002669                | -4.153504 | -2.362051 |
| 51               | 1                | 0              | 0.815474                | -3.918149 | -0.808081 |
| 52               | 1                | 0              | -0.385114               | -5.207347 | -0.996650 |
| 53               | 6                | 0              | -2.570291               | -3.558156 | -1.563964 |
| 54               | 1                | 0              | -2.437876               | -3.521101 | -2.648868 |
| 55               | 1                | 0              | -2.903257               | -4.567865 | -1.308553 |
| 56               | 1                | 0              | -3.371526               | -2.866757 | -1.296038 |
| 57               | 6                | 0              | -0.700462               | -0.845603 | 3.693872  |

|     |   |   |           |           |           |
|-----|---|---|-----------|-----------|-----------|
| 58  | 1 | 0 | -0.485584 | -0.009313 | 3.025635  |
| 59  | 6 | 0 | -1.810709 | -0.389080 | 4.657522  |
| 60  | 1 | 0 | -1.493802 | 0.509318  | 5.194613  |
| 61  | 1 | 0 | -2.733211 | -0.158828 | 4.120915  |
| 62  | 1 | 0 | -2.034264 | -1.155101 | 5.405260  |
| 63  | 6 | 0 | 0.601039  | -1.162126 | 4.456772  |
| 64  | 1 | 0 | 1.399740  | -1.452630 | 3.771758  |
| 65  | 1 | 0 | 0.933536  | -0.283649 | 5.016985  |
| 66  | 1 | 0 | 0.450767  | -1.977571 | 5.170398  |
| 67  | 5 | 0 | 3.387124  | -0.204130 | -0.320825 |
| 68  | 6 | 0 | 2.989629  | -1.381096 | -2.704342 |
| 69  | 1 | 0 | 2.369660  | -2.164209 | -2.249793 |
| 70  | 1 | 0 | 2.311273  | -0.567672 | -2.977921 |
| 71  | 6 | 0 | 3.657935  | -1.946164 | -3.967086 |
| 72  | 1 | 0 | 4.192142  | -1.138983 | -4.486131 |
| 73  | 1 | 0 | 2.897301  | -2.313881 | -4.666198 |
| 74  | 6 | 0 | 4.649164  | -3.066912 | -3.628064 |
| 75  | 1 | 0 | 4.096879  | -3.923636 | -3.219022 |
| 76  | 1 | 0 | 5.151023  | -3.423832 | -4.534475 |
| 77  | 6 | 0 | 5.680862  | -2.595465 | -2.596096 |
| 78  | 1 | 0 | 6.315193  | -1.822833 | -3.050857 |
| 79  | 1 | 0 | 6.346771  | -3.421682 | -2.321320 |
| 80  | 6 | 0 | 5.011415  | -2.016050 | -1.339421 |
| 81  | 1 | 0 | 5.784882  | -1.662827 | -0.651230 |
| 82  | 1 | 0 | 4.481043  | -2.824647 | -0.816497 |
| 83  | 6 | 0 | 4.009094  | -0.879869 | -1.659429 |
| 84  | 1 | 0 | 4.587580  | -0.080302 | -2.152438 |
| 85  | 6 | 0 | 4.442635  | 0.332634  | 0.790196  |
| 86  | 1 | 0 | 4.994490  | -0.560893 | 1.127962  |
| 87  | 6 | 0 | 5.493278  | 1.300344  | 0.192137  |
| 88  | 1 | 0 | 4.980344  | 2.195929  | -0.186358 |
| 89  | 1 | 0 | 5.988752  | 0.844239  | -0.670053 |
| 90  | 6 | 0 | 6.557069  | 1.733953  | 1.213698  |
| 91  | 1 | 0 | 7.155977  | 0.858511  | 1.498491  |
| 92  | 1 | 0 | 7.250402  | 2.448599  | 0.755227  |
| 93  | 6 | 0 | 5.926856  | 2.340235  | 2.473570  |
| 94  | 1 | 0 | 6.702465  | 2.589558  | 3.206452  |
| 95  | 1 | 0 | 5.431751  | 3.284346  | 2.209393  |
| 96  | 6 | 0 | 4.893821  | 1.385818  | 3.086005  |
| 97  | 1 | 0 | 4.415742  | 1.854011  | 3.954634  |
| 98  | 1 | 0 | 5.408927  | 0.490780  | 3.460117  |
| 99  | 6 | 0 | 3.831879  | 0.966524  | 2.058115  |
| 100 | 1 | 0 | 3.128458  | 0.266790  | 2.518736  |
| 101 | 1 | 0 | 3.248547  | 1.850016  | 1.769234  |
| 102 | 6 | 0 | -4.271392 | -0.072601 | -0.239575 |
| 103 | 1 | 0 | -3.683741 | -0.483242 | -1.063275 |
| 104 | 6 | 0 | -5.125818 | -1.168377 | 0.410099  |
| 105 | 1 | 0 | -5.570506 | -0.769792 | 1.330379  |
| 106 | 1 | 0 | -4.494570 | -2.008420 | 0.708964  |
| 107 | 6 | 0 | -6.249034 | -1.637277 | -0.530974 |
| 108 | 1 | 0 | -6.863914 | -2.383915 | -0.019028 |
| 109 | 1 | 0 | -5.808896 | -2.141770 | -1.400400 |
| 110 | 6 | 0 | -7.113873 | -0.465120 | -1.011576 |
| 111 | 1 | 0 | -7.653081 | -0.037545 | -0.156717 |
| 112 | 1 | 0 | -7.874119 | -0.818915 | -1.714703 |
| 113 | 6 | 0 | -6.253349 | 0.624038  | -1.664364 |
| 114 | 1 | 0 | -5.812663 | 0.230790  | -2.589205 |
| 115 | 1 | 0 | -6.871347 | 1.478961  | -1.955605 |
| 116 | 6 | 0 | -5.130569 | 1.101107  | -0.726891 |
| 117 | 1 | 0 | -4.502157 | 1.845269  | -1.221707 |
| 118 | 1 | 0 | -5.575925 | 1.598393  | 0.143762  |

---

## SUPPORTING INFORMATIONS of X-RAY

### Compound **2**

**Table S4.** Sample and crystal data for **2**.

|                               |                           |                     |
|-------------------------------|---------------------------|---------------------|
| <b>Identification code</b>    | <b>2</b>                  |                     |
| <b>Chemical formula</b>       | $C_{27}H_{34}BBr_2N_2S_3$ |                     |
| <b>Formula weight</b>         | 653.37 g/mol              |                     |
| <b>Temperature</b>            | 297(2) K                  |                     |
| <b>Wavelength</b>             | 0.71073 Å                 |                     |
| <b>Crystal size</b>           | 0.100 x 0.240 x 0.300 mm  |                     |
| <b>Crystal system</b>         | orthorhombic              |                     |
| <b>Space group</b>            | Pnma (No. 62)             |                     |
| <b>Unit cell dimensions</b>   | a = 11.5767(6) Å          | $\alpha = 90^\circ$ |
|                               | b = 17.8070(9) Å          | $\beta = 90^\circ$  |
|                               | c = 15.3595(9) Å          | $\gamma = 90^\circ$ |
| <b>Volume</b>                 | 3166.3(3) Å <sup>3</sup>  |                     |
| <b>Z</b>                      | 4                         |                     |
| <b>Density (calculated)</b>   | 1.371 g/cm <sup>3</sup>   |                     |
| <b>Absorption coefficient</b> | 2.776 mm <sup>-1</sup>    |                     |
| <b>F(000)</b>                 | 1332                      |                     |

**Table S5.** Data collection and structure refinement for **2**.

|                                            |                                                                                                                         |
|--------------------------------------------|-------------------------------------------------------------------------------------------------------------------------|
| <b>Theta range for data collection</b>     | 2.48 to 25.25°                                                                                                          |
| <b>Index ranges</b>                        | -13<=h<=13, -21<=k<=20, -18<=l<=18                                                                                      |
| <b>Reflections collected</b>               | 50177                                                                                                                   |
| <b>Independent reflections</b>             | 2968 [R(int) = 0.0829]                                                                                                  |
| <b>Coverage of independent reflections</b> | 99.8%                                                                                                                   |
| <b>Absorption correction</b>               | Multi-Scan                                                                                                              |
| <b>Max. and min. transmission</b>          | 0.7456 and 0.1650                                                                                                       |
| <b>Structure solution technique</b>        | direct methods                                                                                                          |
| <b>Structure solution program</b>          | SHELXS-97 (Sheldrick 2008)                                                                                              |
| <b>Refinement method</b>                   | Full-matrix least-squares on F <sup>2</sup>                                                                             |
| <b>Refinement program</b>                  | SHELXL-2014/7 (Sheldrick, 2014)                                                                                         |
| <b>Function minimized</b>                  | $\Sigma w(F_o^2 - F_c^2)^2$                                                                                             |
| <b>Data / restraints / parameters</b>      | 2968 / 22 / 178                                                                                                         |
| <b>Goodness-of-fit on F<sup>2</sup></b>    | 1.094                                                                                                                   |
| <b><math>\Delta/\sigma_{\max}</math></b>   | 0.002                                                                                                                   |
| <b>Final R indices</b>                     | 2292 data; R1 = 0.0560, wR2 = 0.1366<br>I>2 $\sigma$ (I)<br>all data R1 = 0.0800, wR2 = 0.1596                          |
| <b>Weighting scheme</b>                    | w=1/[ $\sigma^2(F_o^2)+(0.0687P)^2+5.4186P$ ]<br>where P=(F <sub>o</sub> <sup>2</sup> +2F <sub>c</sub> <sup>2</sup> )/3 |
| <b>Largest diff. peak and hole</b>         | 0.938 and -0.790 eÅ <sup>-3</sup>                                                                                       |
| <b>R.M.S. deviation from mean</b>          | 0.077 eÅ <sup>-3</sup>                                                                                                  |

**Table S6.** Bond lengths (Å) for **2**.

|         |           |         |          |
|---------|-----------|---------|----------|
| B1-S2   | 1.927(4)  | B1-S2   | 1.927(4) |
| B1-Br2' | 1.983(11) | B1-Br1  | 1.942(8) |
| B1-Br2  | 1.984(10) | B1-Br1' | 2.022(8) |
| S1-C1   | 1.623(5)  | S2-C2   | 1.682(3) |
| N1-C2   | 1.357(4)  | N1-C1   | 1.396(4) |
| N1-C3   | 1.441(4)  | C1-N1   | 1.396(4) |
| C2-C2   | 1.394(7)  | C3-C8   | 1.390(5) |
| C3-C4   | 1.396(5)  | C4-C5   | 1.393(5) |
| C4-C12  | 1.512(6)  | C5-C6   | 1.371(6) |
| C6-C7   | 1.365(7)  | C7-C8   | 1.377(6) |
| C8-C9   | 1.521(6)  | C9-C10  | 1.527(8) |
| C9-C11  | 1.523(7)  | C12-C14 | 1.514(7) |
| C12-C13 | 1.513(7)  |         |          |



**Table S7.** Bond angles (°) for **2•**.

|             |            |              |            |
|-------------|------------|--------------|------------|
| S2-B1-S2    | 110.3(3)   | S2-B1-Br2'   | 112.5(3)   |
| S2-B1-Br2'  | 112.5(3)   | S2-B1-Br1    | 112.7(3)   |
| S2-B1-Br1   | 112.7(3)   | Br2'-B1-Br1  | 95.7(5)    |
| S2-B1-Br2   | 106.3(3)   | S2-B1-Br2    | 106.3(3)   |
| Br1-B1-Br2  | 108.2(4)   | S2-B1-Br1'   | 107.4(3)   |
| S2-B1-Br1'  | 107.4(3)   | Br2'-B1-Br1' | 106.5(5)   |
| Br2-B1-Br1' | 119.0(4)   | C2-S2-B1     | 92.4(2)    |
| C2-N1-C1    | 110.3(3)   | C2-N1-C3     | 124.9(3)   |
| C1-N1-C3    | 124.7(3)   | N1-C1-N1     | 104.5(4)   |
| N1-C1-S1    | 127.73(19) | N1-C1-S1     | 127.73(19) |
| N1-C2-C2    | 107.45(18) | N1-C2-S2     | 130.8(3)   |
| C2-C2-S2    | 121.69(12) | C8-C3-C4     | 124.1(3)   |
| C8-C3-N1    | 118.0(3)   | C4-C3-N1     | 117.9(3)   |
| C5-C4-C3    | 116.0(4)   | C5-C4-C12    | 121.4(4)   |
| C3-C4-C12   | 122.6(3)   | C6-C5-C4     | 121.4(4)   |
| C5-C6-C7    | 120.1(4)   | C8-C7-C6     | 122.2(4)   |
| C7-C8-C3    | 116.2(4)   | C7-C8-C9     | 122.1(4)   |
| C3-C8-C9    | 121.7(3)   | C10-C9-C8    | 110.0(4)   |
| C10-C9-C11  | 110.7(4)   | C8-C9-C11    | 112.2(4)   |
| C4-C12-C14  | 110.8(4)   | C4-C12-C13   | 112.4(4)   |
| C14-C12-C13 | 110.9(5)   |              |            |

### Compound 3•

**Table S8.** Sample and crystal data for **3•**.

|                               |                                                                                                  |
|-------------------------------|--------------------------------------------------------------------------------------------------|
| <b>Identification code</b>    | uga1267                                                                                          |
| <b>Chemical formula</b>       | C <sub>39</sub> H <sub>56</sub> BN <sub>2</sub> S <sub>3</sub>                                   |
| <b>Formula weight</b>         | 659.84 g/mol                                                                                     |
| <b>Temperature</b>            | 296(2) K                                                                                         |
| <b>Wavelength</b>             | 0.71073 Å                                                                                        |
| <b>Crystal size</b>           | 0.100 x 0.250 x 0.340 mm                                                                         |
| <b>Crystal system</b>         | monoclinic                                                                                       |
| <b>Space group</b>            | P2 <sub>1</sub> /c (No. 14)                                                                      |
| <b>Unit cell dimensions</b>   | a = 10.8184(14) Å    α = 90°<br>b = 22.527(3) Å    β = 103.111(3)°<br>c = 16.534(2) Å    γ = 90° |
| <b>Volume</b>                 | 3924.2(9) Å <sup>3</sup>                                                                         |
| <b>Z</b>                      | 4                                                                                                |
| <b>Density (calculated)</b>   | 1.117 g/cm <sup>3</sup>                                                                          |
| <b>Absorption coefficient</b> | 0.217 mm <sup>-1</sup>                                                                           |
| <b>F(000)</b>                 | 1428                                                                                             |

**Table S9.** Data collection and structure refinement for **3**.

|                                            |                                                                                                                         |
|--------------------------------------------|-------------------------------------------------------------------------------------------------------------------------|
| <b>Theta range for data collection</b>     | 2.21 to 26.02°                                                                                                          |
| <b>Index ranges</b>                        | -13<=h<=13, -27<=k<=27, -20<=l<=20                                                                                      |
| <b>Reflections collected</b>               | 70942                                                                                                                   |
| <b>Independent reflections</b>             | 7746 [R(int) = 0.1088]                                                                                                  |
| <b>Coverage of independent reflections</b> | 99.9%                                                                                                                   |
| <b>Absorption correction</b>               | Multi-Scan                                                                                                              |
| <b>Max. and min. transmission</b>          | 0.7454 and 0.6212                                                                                                       |
| <b>Structure solution technique</b>        | direct methods                                                                                                          |
| <b>Structure solution program</b>          | SHELXS-97 (Sheldrick 2008)                                                                                              |
| <b>Refinement method</b>                   | Full-matrix least-squares on F <sup>2</sup>                                                                             |
| <b>Refinement program</b>                  | SHELXL-2014/7 (Sheldrick, 2014)                                                                                         |
| <b>Function minimized</b>                  | $\Sigma w(F_o^2 - F_c^2)^2$                                                                                             |
| <b>Data / restraints / parameters</b>      | 7746 / 0 / 406                                                                                                          |
| <b>Goodness-of-fit on F<sup>2</sup></b>    | 1.043                                                                                                                   |
| <b><math>\Delta/\sigma_{\max}</math></b>   | 0.001                                                                                                                   |
| <b>Final R indices</b>                     | 4536 data; R1 = 0.0739, wR2 = 0.1719<br>I>2 $\sigma$ (I)<br>all data R1 = 0.1340, wR2 = 0.2120                          |
| <b>Weighting scheme</b>                    | w=1/[ $\sigma^2(F_o^2)+(0.0899P)^2+3.4455P$ ]<br>where P=(F <sub>o</sub> <sup>2</sup> +2F <sub>c</sub> <sup>2</sup> )/3 |
| <b>Largest diff. peak and hole</b>         | 0.340 and -0.284 eÅ <sup>-3</sup>                                                                                       |
| <b>R.M.S. deviation from mean</b>          | 0.068 eÅ <sup>-3</sup>                                                                                                  |

**Table S10.** Bond lengths (Å) for **3**•.

|         |          |         |          |
|---------|----------|---------|----------|
| B1-C33  | 1.607(6) | B1-C34  | 1.612(6) |
| B1-S3   | 2.028(4) | B1-S2   | 2.026(4) |
| S1-C1   | 1.633(4) | S2-C2   | 1.680(3) |
| S3-C3   | 1.694(3) | N1-C2   | 1.373(4) |
| N1-C1   | 1.394(4) | N1-C16  | 1.454(4) |
| N2-C3   | 1.361(4) | N2-C1   | 1.388(4) |
| N2-C4   | 1.453(4) | C2-C3   | 1.388(4) |
| C4-C5   | 1.388(5) | C4-C9   | 1.390(5) |
| C5-C6   | 1.387(5) | C5-C13  | 1.512(6) |
| C6-C7   | 1.364(6) | C7-C8   | 1.373(6) |
| C8-C9   | 1.392(5) | C9-C10  | 1.507(6) |
| C10-C11 | 1.514(6) | C10-C12 | 1.493(7) |
| C13-C14 | 1.521(7) | C13-C15 | 1.526(8) |
| C16-C17 | 1.377(5) | C16-C21 | 1.385(5) |
| C17-C18 | 1.401(6) | C17-C25 | 1.507(6) |
| C18-C19 | 1.366(7) | C19-C20 | 1.357(7) |
| C20-C21 | 1.392(5) | C21-C22 | 1.515(6) |
| C22-C24 | 1.523(6) | C22-C23 | 1.513(6) |
| C25-C26 | 1.501(7) | C25-C27 | 1.486(7) |
| C28-C33 | 1.531(5) | C28-C29 | 1.521(6) |
| C29-C30 | 1.504(7) | C30-C31 | 1.512(7) |
| C31-C32 | 1.528(6) | C32-C33 | 1.531(5) |
| C34-C39 | 1.531(5) | C34-C35 | 1.527(5) |
| C35-C36 | 1.529(6) | C36-C37 | 1.491(6) |
| C37-C38 | 1.520(6) | C38-C39 | 1.512(6) |

**Table S11.** Bond angles (°) for **3**•.

|             |           |             |            |
|-------------|-----------|-------------|------------|
| C33-B1-C34  | 118.8(3)  | C33-B1-S3   | 107.5(3)   |
| C34-B1-S3   | 110.1(3)  | C33-B1-S2   | 108.4(3)   |
| C34-B1-S2   | 107.7(3)  | S3-B1-S2    | 103.27(18) |
| C2-S2-B1    | 94.94(16) | C3-S3-B1    | 95.26(17)  |
| C2-N1-C1    | 110.1(3)  | C2-N1-C16   | 126.6(3)   |
| C1-N1-C16   | 123.3(3)  | C3-N2-C1    | 110.1(3)   |
| C3-N2-C4    | 125.8(3)  | C1-N2-C4    | 124.1(3)   |
| N2-C1-N1    | 105.0(3)  | N2-C1-S1    | 127.7(3)   |
| N1-C1-S1    | 127.3(3)  | C3-C2-N1    | 106.8(3)   |
| C3-C2-S2    | 122.9(3)  | N1-C2-S2    | 130.3(2)   |
| N2-C3-C2    | 108.1(3)  | N2-C3-S3    | 130.7(3)   |
| C2-C3-S3    | 121.2(3)  | C5-C4-C9    | 124.1(3)   |
| C5-C4-N2    | 118.2(3)  | C9-C4-N2    | 117.6(3)   |
| C4-C5-C6    | 116.1(4)  | C4-C5-C13   | 123.1(3)   |
| C6-C5-C13   | 120.8(4)  | C7-C6-C5    | 122.2(4)   |
| C6-C7-C8    | 119.9(4)  | C7-C8-C9    | 121.5(4)   |
| C4-C9-C8    | 116.3(4)  | C4-C9-C10   | 123.7(3)   |
| C8-C9-C10   | 120.0(4)  | C9-C10-C11  | 110.9(4)   |
| C9-C10-C12  | 113.2(4)  | C11-C10-C12 | 111.9(5)   |
| C14-C13-C5  | 110.9(4)  | C14-C13-C15 | 112.5(5)   |
| C5-C13-C15  | 111.9(4)  | C17-C16-C21 | 124.8(3)   |
| C17-C16-N1  | 117.9(3)  | C21-C16-N1  | 117.2(3)   |
| C16-C17-C18 | 115.9(4)  | C16-C17-C25 | 122.7(3)   |
| C18-C17-C25 | 121.4(4)  | C19-C18-C17 | 120.9(4)   |
| C20-C19-C18 | 121.0(4)  | C19-C20-C21 | 121.3(4)   |
| C16-C21-C20 | 116.0(4)  | C16-C21-C22 | 124.0(3)   |
| C20-C21-C22 | 120.1(4)  | C21-C22-C24 | 111.2(4)   |
| C21-C22-C23 | 112.2(4)  | C24-C22-C23 | 112.0(4)   |
| C17-C25-C26 | 111.9(4)  | C17-C25-C27 | 113.5(4)   |
| C26-C25-C27 | 110.6(5)  | C33-C28-C29 | 114.2(4)   |
| C30-C29-C28 | 111.7(4)  | C31-C30-C29 | 110.6(5)   |
| C30-C31-C32 | 111.4(4)  | C31-C32-C33 | 112.6(4)   |
| C28-C33-C32 | 109.1(3)  | C28-C33-B1  | 115.6(3)   |
| C32-C33-B1  | 112.6(3)  | C39-C34-C35 | 108.5(3)   |
| C39-C34-B1  | 116.3(3)  | C35-C34-B1  | 113.8(3)   |

|             |          |             |          |
|-------------|----------|-------------|----------|
| C34-C35-C36 | 111.7(4) | C37-C36-C35 | 111.9(4) |
| C36-C37-C38 | 111.7(4) | C39-C38-C37 | 111.4(4) |
| C38-C39-C34 | 112.5(3) |             |          |

## Compound 4

**Table S12.** Sample and crystal data for **4**.

|                               |                                                                                                                  |
|-------------------------------|------------------------------------------------------------------------------------------------------------------|
| <b>Identification code</b>    | uga1273                                                                                                          |
| <b>Chemical formula</b>       | C <sub>45</sub> H <sub>67</sub> BN <sub>2</sub> S <sub>3</sub>                                                   |
| <b>Formula weight</b>         | 742.99 g/mol                                                                                                     |
| <b>Temperature</b>            | 298(2) K                                                                                                         |
| <b>Wavelength</b>             | 0.71073 Å                                                                                                        |
| <b>Crystal size</b>           | 0.120 x 0.220 x 0.400 mm                                                                                         |
| <b>Crystal system</b>         | monoclinic                                                                                                       |
| <b>Space group</b>            | C2/c (No. 15)                                                                                                    |
| <b>Unit cell dimensions</b>   | a = 34.0880(16) Å $\alpha$ = 90°<br>b = 10.7509(5) Å $\beta$ = 111.7780(10)°<br>c = 26.1095(12) Å $\gamma$ = 90° |
| <b>Volume</b>                 | 8885.6(7) Å <sup>3</sup>                                                                                         |
| <b>Z</b>                      | 8                                                                                                                |
| <b>Density (calculated)</b>   | 1.111 g/cm <sup>3</sup>                                                                                          |
| <b>Absorption coefficient</b> | 0.198 mm <sup>-1</sup>                                                                                           |
| <b>F(000)</b>                 | 3232                                                                                                             |

**Table S13.** Data collection and structure refinement for **4**.

|                                          |                                             |
|------------------------------------------|---------------------------------------------|
| <b>Theta range for data collection</b>   | 2.08 to 27.88°                              |
| <b>Index ranges</b>                      | -44<=h<=44, -14<=k<=14, -34<=l<=34          |
| <b>Reflections collected</b>             | 143568                                      |
| <b>Independent reflections</b>           | 10584 [R(int) = 0.0559]                     |
| <b>Max. and min. transmission</b>        | 0.7457 and 0.6045                           |
| <b>Structure solution technique</b>      | direct methods                              |
| <b>Structure solution program</b>        | SHELXS-97 (Sheldrick 2008)                  |
| <b>Refinement method</b>                 | Full-matrix least-squares on F <sup>2</sup> |
| <b>Refinement program</b>                | SHELXL-2014/7 (Sheldrick, 2014)             |
| <b>Function minimized</b>                | $\Sigma w(F_o^2 - F_c^2)^2$                 |
| <b>Data / restraints / parameters</b>    | 10584 / 377 / 571                           |
| <b>Goodness-of-fit on F<sup>2</sup></b>  | 1.032                                       |
| <b><math>\Delta/\sigma_{\max}</math></b> | 0.001                                       |

|                                    |                                                                                                                                                               |                           |
|------------------------------------|---------------------------------------------------------------------------------------------------------------------------------------------------------------|---------------------------|
| <b>Final R indices</b>             | 6992 data;<br>I>2σ(I)                                                                                                                                         | R1 = 0.0542, wR2 = 0.1272 |
|                                    | all data                                                                                                                                                      | R1 = 0.0921, wR2 = 0.1473 |
| <b>Weighting scheme</b>            | w=1/[σ <sup>2</sup> (F <sub>o</sub> <sup>2</sup> )+(0.0648P) <sup>2</sup> +5.2403P]<br>where P=(F <sub>o</sub> <sup>2</sup> +2F <sub>c</sub> <sup>2</sup> )/3 |                           |
| <b>Largest diff. peak and hole</b> | 0.500 and -0.297 eÅ <sup>-3</sup>                                                                                                                             |                           |
| <b>R.M.S. deviation from mean</b>  | 0.035 eÅ <sup>-3</sup>                                                                                                                                        |                           |

**Table S14.** Bond lengths (Å) for **4**.

|           |            |           |            |
|-----------|------------|-----------|------------|
| S1-C1     | 1.7256(18) | S1-C40'   | 1.833(12)  |
| S1-C40    | 1.834(4)   | S2-C2     | 1.7078(18) |
| S2-B1     | 2.027(2)   | S3-C3     | 1.7120(18) |
| S3-B1     | 2.031(2)   | N1-C1     | 1.356(2)   |
| N1-C2     | 1.379(2)   | N1-C16    | 1.449(2)   |
| N2-C1     | 1.359(2)   | N2-C3     | 1.378(2)   |
| N2-C4     | 1.450(2)   | C2-C3     | 1.365(2)   |
| C4-C9     | 1.384(3)   | C4-C5     | 1.389(3)   |
| C5-C6     | 1.389(3)   | C5-C13'   | 1.488(11)  |
| C5-C13    | 1.560(8)   | C6-C7     | 1.355(4)   |
| C7-C8     | 1.358(4)   | C8-C9     | 1.392(3)   |
| C9-C10    | 1.504(7)   | C9-C10'   | 1.531(13)  |
| C10-C11   | 1.505(7)   | C10-C12   | 1.553(9)   |
| C10'-C11' | 1.514(12)  | C10'-C12' | 1.558(12)  |
| C13-C14   | 1.527(8)   | C13-C15   | 1.509(8)   |
| C13'-C15' | 1.508(10)  | C13'-C14' | 1.496(11)  |
| C16-C17   | 1.394(3)   | C16-C21   | 1.396(3)   |
| C17-C18   | 1.397(3)   | C17-C25   | 1.512(3)   |
| C18-C19   | 1.365(4)   | C19-C20   | 1.361(4)   |
| C20-C21   | 1.391(3)   | C21-C22   | 1.516(3)   |
| C22-C24   | 1.527(4)   | C22-C23   | 1.524(3)   |
| C25-C26   | 1.525(3)   | C25-C27   | 1.515(4)   |
| B1-C34    | 1.607(3)   | B1-C33    | 1.611(3)   |
| C28-C29   | 1.521(4)   | C28-C33   | 1.527(3)   |
| C29-C30   | 1.505(4)   | C30-C31   | 1.512(4)   |
| C31-C32   | 1.524(3)   | C32-C33   | 1.531(3)   |
| C34-C35   | 1.528(3)   | C34-C39   | 1.530(3)   |
| C35-C36   | 1.518(3)   | C36-C37   | 1.511(4)   |



|           |           |           |           |
|-----------|-----------|-----------|-----------|
| C37-C38   | 1.505(4)  | C38-C39   | 1.528(4)  |
| C40-C45   | 1.501(5)  | C40-C41   | 1.488(5)  |
| C41-C42   | 1.513(5)  | C42-C43   | 1.587(6)  |
| C43-C44   | 1.430(6)  | C44-C45   | 1.596(6)  |
| C40'-C45' | 1.559(17) | C40'-C41' | 1.522(13) |
| C41'-C42' | 1.503(12) | C42'-C43' | 1.525(13) |
| C43'-C44' | 1.509(13) | C44'-C45' | 1.559(13) |

**Table S15.** Bond angles (°) for **4**.

|                |            |              |            |
|----------------|------------|--------------|------------|
| C1-S1-C40'     | 111.4(7)   | C1-S1-C40    | 104.81(16) |
| C2-S2-B1       | 94.96(8)   | C3-S3-B1     | 95.03(8)   |
| C1-N1-C2       | 109.33(14) | C1-N1-C16    | 125.75(14) |
| C2-N1-C16      | 124.91(14) | C1-N2-C3     | 109.44(14) |
| C1-N2-C4       | 124.54(14) | C3-N2-C4     | 125.61(15) |
| N2-C1-N1       | 106.82(14) | N2-C1-S1     | 124.40(13) |
| N1-C1-S1       | 127.79(14) | N1-C2-C3     | 107.29(15) |
| N1-C2-S2       | 129.69(13) | C3-C2-S2     | 123.01(14) |
| N2-C3-C2       | 107.12(15) | N2-C3-S3     | 130.53(13) |
| C2-C3-S3       | 122.35(14) | C9-C4-C5     | 123.29(18) |
| C9-C4-N2       | 118.87(18) | C5-C4-N2     | 117.85(18) |
| C6-C5-C4       | 116.8(2)   | C6-C5-C13'   | 122.2(6)   |
| C4-C5-C13'     | 118.5(6)   | C6-C5-C13    | 119.2(3)   |
| C4-C5-C13      | 123.0(3)   | C5-C6-C7     | 121.2(2)   |
| C8-C7-C6       | 120.7(2)   | C7-C8-C9     | 121.6(2)   |
| C4-C9-C8       | 116.4(2)   | C4-C9-C10    | 120.9(5)   |
| C8-C9-C10      | 122.7(5)   | C4-C9-C10'   | 123.2(10)  |
| C8-C9-C10'     | 119.7(10)  | C9-C10-C11   | 106.1(5)   |
| C9-C10-C12     | 109.1(7)   | C11-C10-C12  | 108.9(7)   |
| C9-C10'-C11'   | 124.0(14)  | C9-C10'-C12' | 115.4(10)  |
| C11'-C10'-C12' | 106.9(10)  | C14-C13-C15  | 111.9(5)   |
| C14-C13-C5     | 115.2(6)   | C15-C13-C5   | 110.2(6)   |
| C5-C13'-C15'   | 115.7(10)  | C5-C13'-C14' | 101.1(10)  |
| C15'-C13'-C14' | 110.5(9)   | C17-C16-C21  | 124.17(18) |
| C17-C16-N1     | 117.92(18) | C21-C16-N1   | 117.91(17) |
| C16-C17-C18    | 115.9(2)   | C16-C17-C25  | 122.76(19) |
| C18-C17-C25    | 121.3(2)   | C19-C18-C17  | 121.3(2)   |
| C18-C19-C20    | 121.1(2)   | C19-C20-C21  | 121.3(2)   |
| C20-C21-C16    | 116.2(2)   | C20-C21-C22  | 119.6(2)   |

|                |            |                |            |
|----------------|------------|----------------|------------|
| C16-C21-C22    | 124.27(18) | C21-C22-C24    | 112.5(2)   |
| C21-C22-C23    | 110.7(2)   | C24-C22-C23    | 109.0(2)   |
| C26-C25-C17    | 112.4(2)   | C26-C25-C27    | 111.3(3)   |
| C17-C25-C27    | 111.2(2)   | C34-B1-C33     | 117.05(16) |
| C34-B1-S2      | 108.86(14) | C33-B1-S2      | 107.78(15) |
| C34-B1-S3      | 108.18(15) | C33-B1-S3      | 109.62(14) |
| S2-B1-S3       | 104.64(9)  | C29-C28-C33    | 113.3(2)   |
| C28-C29-C30    | 111.5(2)   | C31-C30-C29    | 111.0(2)   |
| C30-C31-C32    | 111.3(2)   | C31-C32-C33    | 113.9(2)   |
| C28-C33-C32    | 109.00(19) | C28-C33-B1     | 116.59(18) |
| C32-C33-B1     | 111.96(17) | C35-C34-C39    | 109.14(18) |
| C35-C34-B1     | 112.28(17) | C39-C34-B1     | 115.79(17) |
| C34-C35-C36    | 113.8(2)   | C37-C36-C35    | 111.4(2)   |
| C38-C37-C36    | 110.5(2)   | C37-C38-C39    | 111.5(2)   |
| C34-C39-C38    | 113.4(2)   | C45-C40-C41    | 110.9(3)   |
| C45-C40-S1     | 104.8(3)   | C41-C40-S1     | 114.7(3)   |
| C40-C41-C42    | 113.6(3)   | C41-C42-C43    | 107.7(4)   |
| C42-C43-C44    | 112.0(4)   | C45-C44-C43    | 109.6(4)   |
| C40-C45-C44    | 112.1(4)   | C45'-C40'-C41' | 85.4(13)   |
| C45'-C40'-S1   | 133.9(19)  | C41'-C40'-S1   | 98.9(10)   |
| C42'-C41'-C40' | 110.5(11)  | C43'-C42'-C41' | 123.6(13)  |
| C42'-C43'-C44' | 111.8(13)  | C43'-C44'-C45' | 100.2(13)  |
| C40'-C45'-C44' | 100.8(12)  |                |            |
